# Supplementary material for: A dual-signal electrochemical immunosensor for the detection of HPV16 E6 oncoprotein based on PdBP dendritic ternary nanospheres and MBSi-Chi nanocomposites
Source: Royal Society of Chemistry journal article supplement (doi:10.1039/d1an02120f), 2022-01-01
Supplement: d1an02120f1.pdf [file d1an02120f1.pdf]

*Electronic Supplementary Information*

**A dual-signal electrochemical immunosensor for detection of HPV16  
E6 oncoprotein based on PdBP dendritic ternary nanospheres and  
MBSi-Chi nanocomposites**

Tao Wen, <sup>†a</sup> Chenchen Xia, <sup>†a</sup> Qiubo Yu, <sup>b</sup> Yujie Yu, <sup>c</sup> Siyuan Li, <sup>a</sup> Chunli Zhou, <sup>a</sup>  
Kexin Sun<sup>\*d</sup> and Song Yue<sup>\*e</sup>

*a. Institute of Life Science, Chongqing Medical University, Chongqing 400016, P.R. China.*

*b. Molecular Medical Laboratory and Department of Pathology, Chongqing Medical University, Chongqing 400016, P.R. China.*

*c. School of Public Health and Management, Chongqing Medical University, Chongqing 400016, P.R. China.*

*d. Department of Ophthalmology, The First Affiliated Hospital of Chongqing Medical University, Chongqing Key Laboratory of Ophthalmology, Chongqing Eye Institute, Chongqing, 400016, P.R. China. E-mail: 2020320074@stu.cqmu.edu.cn*

*e. Obstetrics and Gynecology Department, The Second Affiliated Hospital of Chongqing Medical University, Chongqing, 400016, P.R. China. E-mail: yuesongsong666@163.com; Fax: +(86) 23-68865186; Tel: +(86)23 -68815186*

Tao Wen <sup>†a</sup> and Chenchen Xia <sup>†a</sup> contributed equally to this work.

Song Yue<sup>\*e</sup> and Kexin Sun<sup>\*d</sup> are joint corresponding authors.

Full address: Chongqing Medical University, 1 Yi Xue Yuan Road, Chongqing 400016, P. R. China.

## **The synthesis of MSN**

An aqueous solution (12 mL) that contained CTAB (25 mg), NaOH (7 mg) was added into a flask, and then the flask was heated to 80°C in a silicone oil bath for 1 h. Then, 125 µL of TEOS was added into the flask dropwise, keeping heating for 2 h. The resultant solution was centrifuged at 10000 rpm for 10 min and washed three times with methanol. Subsequently, the precipitation was dispersed in ethanol. Pore system can be opened via extraction. The extraction solution was composed of ethanol (7.2 mL) and concentrated hydrochloric acid (0.8 mL). 4 ml of extraction solution was added into the ethanol dispersion and then heated at 90°C for 45 min. Following centrifugation and washing with ethanol/H<sub>2</sub>O, the previous step was repeated. Ultimately, MSN was prepared and dried in vacuum at 37°C for about 20 h.

## **Optimization of experimental conditions**

Some factors will affect the performance of immunosensor. In this work, certain crucial parameters were taken into consideration, like volume of PdBP NSs, antibody capture time, incubation time between antigen and antibody and concentration of H<sub>2</sub>O<sub>2</sub>. The results were presented in Fig. S3.

The volume of PdBP NSs was a critical factor that offered an ideal platform for antibody binding, which was analyzed in Fig. S3A. The current value increased gradually ranging from 6 to 10 µL, and then decreased slightly when the volume was raised to 12 µL. Thus, 10 µL was selected as the optimal volume.

The capture time at which the antibodies were bound to the modified electrode was also a rather important factor in performance. When we gradually extended capture time to 2h, current change appeared to increase and then began to level off (Fig. S3B). Hence, 2 h was decided as the optimal antibody capture time.

To maximizing the binding time, we optimized incubation time between antigen and antibody at 37 °C. The incubation time was tested in the range from 0.5 h to 2.5 h. In Fig. S3C, current change was augmented from 0.5 to 2 h, and if we continued to extend incubation time, the current change does not change obviously. Thus, 2 h was used as the optimal combination time.

In addition, the concentration of H<sub>2</sub>O<sub>2</sub> also plays a key part. 10 μL of PdBP NSs were dropped on the cleaned GCE and dried at room temperature. Then, i-t amperometric curves was used to record the current values ( $\Delta\text{Current} = \text{Current}_{100\text{s}} - \text{Current}_{40\text{s}}$ ) with different concentration of H<sub>2</sub>O<sub>2</sub> (20 μL) adding into a 5 mL PBS buffer. As shown in Fig. S3D, current signal increased rapidly with the concentration increasing from 2.2 to 3.0 mol/L and reached maximum at 3.0 mol/L. After dropping 3.2 mol/L of H<sub>2</sub>O<sub>2</sub>, current signal declined instead. Hence, 3.0 mol/L was determined as the optimal concentration of H<sub>2</sub>O<sub>2</sub>.

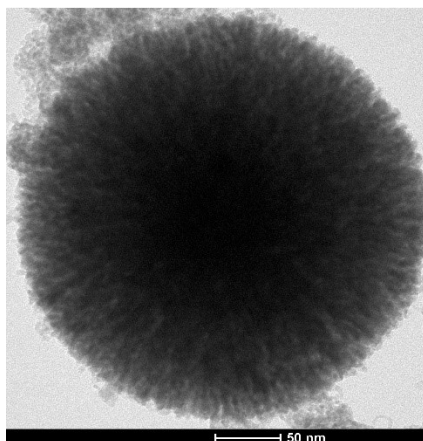

**Fig. S1** FE-TEM image of PdBP NSs after electrochemical analysis in a 5 mL PBS buffer with  $\text{H}_2\text{O}_2$  adding into the solution.

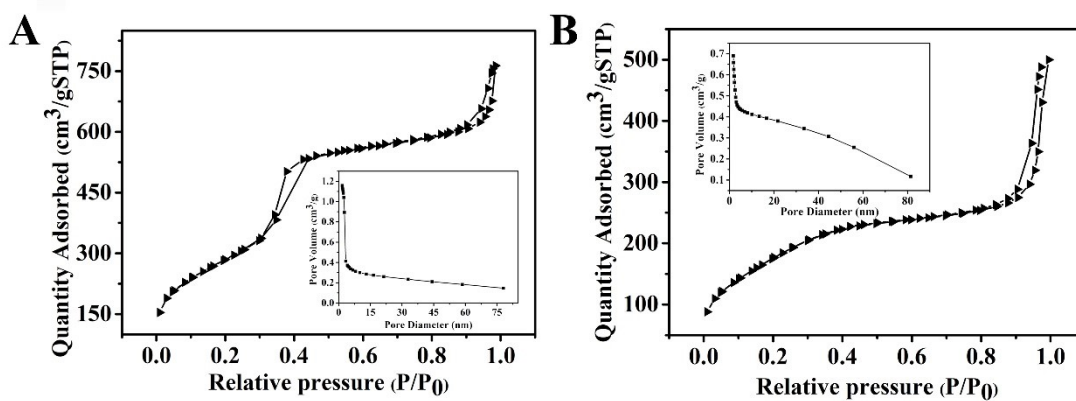

**Fig. S2** N<sub>2</sub> adsorption-desorption isotherm of (A) MSN, (B) MBSi-Chi (inset is its BJH desorption pore distribution curve).

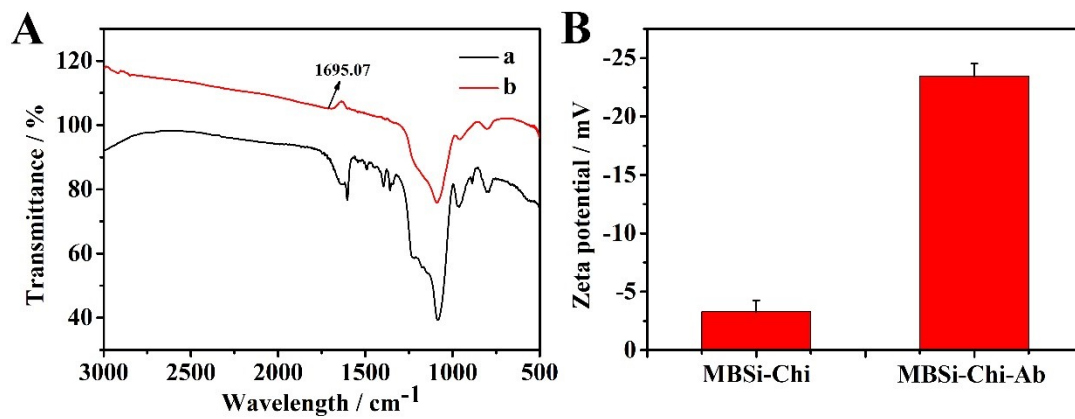

**Fig. S3** (A) FT-IR spectrum of (a) MBSi-Chi, (b) MBSi-Chi-Ab nanocomposites. (B) Zeta potential of (a) MBSi-Chi, (b) MBSi-Chi-Ab nanocomposites.

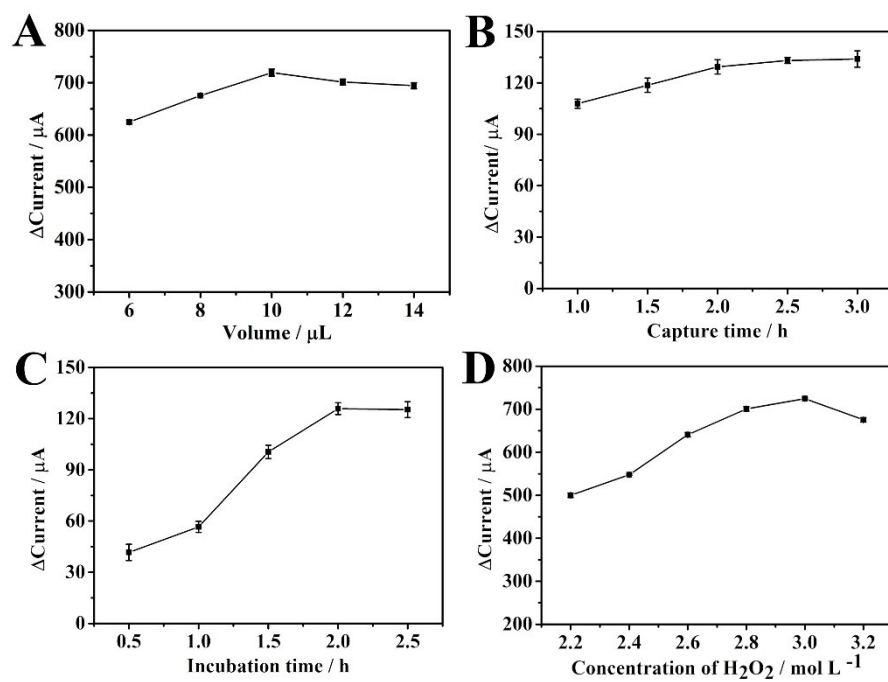

**Fig. S4** Optimization: (A) volume of PdBP NSs, (B) capture time, (C) incubation time, (D) concentration of  $\text{H}_2\text{O}_2$ .

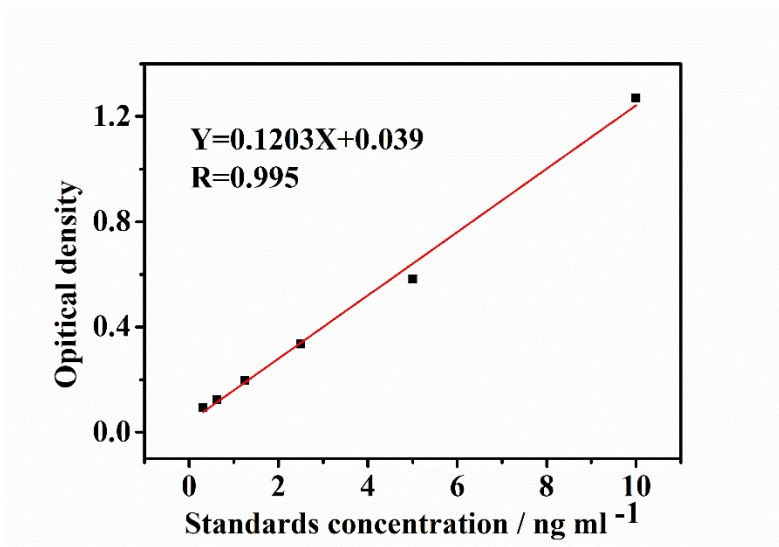

**Fig. S5** The calibration curve of the HPV16 E6 oncoprotein ELISA kit.



**Table S1.** ICP-OES of ternary PdBP NSs.

| Element type | Instrument reading | Final content | Unit |
|--------------|--------------------|---------------|------|
| Pd           | 0.7317             | 7.317         | mg/L |
| B            | 0.0066             | 0.066         | mg/L |
| P            | 0.0086             | 0.086         | mg/L |

**Table S2.** Comparison of analytical performance with previous reported immunosensors

| Materials                                                                                                          | Target                  | Linear range             | Limit of detection | Reference                 |
|--------------------------------------------------------------------------------------------------------------------|-------------------------|--------------------------|--------------------|---------------------------|
| 516-MOF/Anti-vomitoxin                                                                                             | Vomitoxin               | 0.001 ~ 0.5 ng/mL        | 0.7 pg/mL          | 1                         |
| BP-PAMI modified LBG                                                                                               | IL-6                    | 0.003 ~ 75 ng/mL         | 1 pg/mL            | 2                         |
| In <sub>2</sub> O <sub>3</sub> /<br>In <sub>2</sub> S <sub>3</sub> /CdIn <sub>2</sub> S <sub>4</sub> ,<br>PDA@CNTs | CYFRA 21–<br>1          | 0.5 pg/mL ~ 50<br>ng/mL  | 0.16 pg/mL         | 3                         |
| SiO <sub>2</sub> -Fc-COOH-Au,<br>UiO-66-TB                                                                         | Procalcitonin           | 1 pg/mL ~ 100<br>ng/mL   | 0.3 pg/mL          | 4                         |
| g-C <sub>3</sub> N <sub>4</sub> /Au/WO <sub>3</sub>                                                                | Aflatoxin B1            | 1.0 pg/mL ~ 100<br>ng/mL | 0.33 pg/mL         | 5                         |
| Au NFs, Fc-aptamer,<br>MB-cDNA                                                                                     | Aflatoxin B1            | 0.1 pg/mL ~ 1<br>ng/mL   | 0.32 pg/mL         | 6                         |
| Fc-DNA, MB                                                                                                         | Ochratoxin<br>A         | 10 pg/mL ~ 10<br>ng/mL   | 3.3 pg/mL          | 7                         |
| ns@gold                                                                                                            | EGFR<br>receptor        | 10 pg/mL ~ 100<br>ng/mL  | 6.9 pg/mL          | 8                         |
| SA-β-Gal-CaHPO <sub>4</sub><br>Nanoflower                                                                          | AFP                     | 0.1 pg/mL ~ 10<br>ng/mL  | 0.17 ng/mL         | 9                         |
| Au NPs/SnO <sub>2</sub> /ZnIn <sub>2</sub> S <sub>4</sub>                                                          | RNase A                 | 1 pg/mL ~ 10<br>ng/mL    | 0.2 pg/mL          | 10                        |
| Molybdophosphate<br>precipitate                                                                                    |                         | 10 pg/mL ~ 5<br>ng/mL    | 2 pg/mL            |                           |
| PdBP NSs, MBSi-Chi<br>nanocomposites                                                                               | HPV16 E6<br>oncoprotein | 100 fg/mL ~ 4<br>ng/mL   | 72.8 fg/mL         | This work<br>(label-free) |
|                                                                                                                    |                         | 50 fg/mL ~ 4<br>ng/mL    | 34.1 fg/mL         | This work<br>(sandwich)   |

**Table S3.** Detection of HPV16 E6 oncoprotein in five real samples

| Sample no. | ELISA | This work (label-free) (pg/mL) | Relative error (%) | This work (sandwich) (pg/mL) | Relative error (%) |
|------------|-------|--------------------------------|--------------------|------------------------------|--------------------|
| 1          | 436.3 | 457.09                         | 4.77               | 426.56                       | -2.23              |
| 2          | 808.8 | 794.33                         | -1.79              | 776.25                       | -4.02              |
| 3          | 1379  | 1445.44                        | 4.82               | 1445.44                      | 4.82               |
| 4          | 2020  | 2137.96                        | 5.84               | 2089.3                       | 3.43               |
| 5          | 2760  | 2951.21                        | 6.93               | 2818.38                      | 2.12               |

## References

- 1 C. S. Liu, C. X. Sun, J. Y. Tian, Z. W. Wang, H. F. Ji, Y. P. Song, S. Zhang, Z. H. Zhang, L. H. He and M. Du, *Biosens. Bioelectron.*, 2017, **91**, 804-810.
- 2 S. Chandra Barman, M. Sharifuzzaman, M. A. Zahed, C. Park, S. H. Yoon, S. Zhang, H. Kim, H. Yoon and J. Y. Park, *Biosens. Bioelectron.*, 2021, **186**, 113287.
- 3 T. T. Wu, J. H. Feng, S. T. Zhang, L. Liu, X. Ren, D. W. Fan, X. Kuang, X. Sun, Q. Wei, H. X. Ju, *Biosens. Bioelectron.*, 2020, **169**, 112580.
- 4 J. C. Miao, K. Du, X. Li, X. T. Xu, X. Dong, J. L. Fang, W. Cao and Q. Wei, *Biosens. Bioelectron.*, 2021, **171**, 112713.
- 5 F. B. Pei, S. S. Feng, Y. Wu, X. C. Lv, H. L. Wang, S. M. Chen, Q. L. Hao, Y. Cao, W. Lei and Z. Y. Tong, *Biosens. Bioelectron.*, 2021, **189**, 113373.
- 6 H. N. Cui, K. Q. An, C. Q. Wang, Y. F. Chen, S. L. Jia, J. Qian, N. Hao, J. Wei and K. Wang, *Sensors Actuators B: Chem.*, 2022, **355**, 131238.
- 7 C. X. Zhu, D. Liu, Y. Y. Li, X. L. Shen, S. Ma, Y. Liu and T. Y. You, *Biosens. Bioelectron.*, 2020, **150**, 111814.
- 8 S. Bakshi, S. Mehta, T. Kumeria, M. J. A. Shiddiky, A. Popat, S. Choudhury and S. Bose, R. Nayak, *Sensors Actuators B: Chem.*, 2021, **326**, 128803.
- 9 Y. C. Liu, B. Wang, X. H. Ji and Z. K. He, *Anal. Bioanal. Chem.*, 2018, **410**, 7591-7598.
- 10 Y. Ying, M. Zhou, S. Dai, M. Ma, W. F. Deng, Y. M. Tan and Q. J. Xie, *Sensors Actuators B: Chem.*, 2022, **354**, 131251.
